# Supplementary material for: A dual switch controls bacterial enhancer-dependent transcription
Source: PubMed Central journal article supplement — Nucleic Acids Res. 2012 Sep 8;40(21):10878–92. doi: 10.1093/nar/gks844 (PMC3505966; doi:10.1093/nar/gks844), 2012-09-08
Supplement: supp_gks844_nar-01458-2012-File011.pdf [file supp_gks844_nar-01458-2012-File011.pdf]

## Supplementary Information

- Supplementary Figures and Legends

## Supplementary Figures

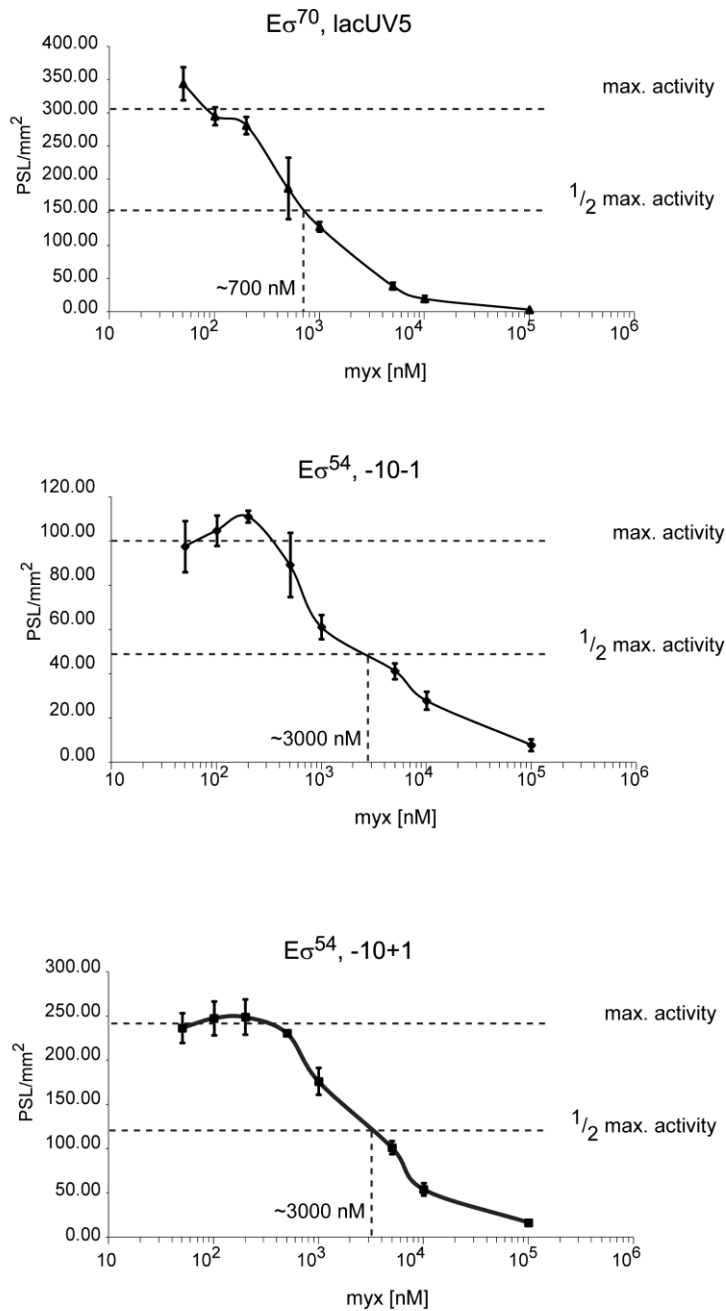

Fig.S1

**Fig. S1: Myxopyronin titrations.**

$E\sigma^{54}$  holoenzymes are less sensitive to myxopyronin than  $E\sigma^{70}$  holoenzymes. In spRNA assays measuring the accumulation of a radiolabelled tetramer, the activity of wt  $E\sigma^{54}$  is reduced by 50% in the presence of  $\sim 3\mu\text{M}$  myxopyronin (both with the -10-1/WT and the -10+1/WT template) whereas wt  $E\sigma^{70}$  is reduced to the same extent at concentrations of  $\sim 700\text{nM}$  myxopyronin. The -10-1/WT and the -10+1/WT templates used represent the *nifH* promoter with a mismatch from nucleotide -10 to -1 (or +1, respectively) to mimic the transcription bubble (detailed information about both templates in main text).

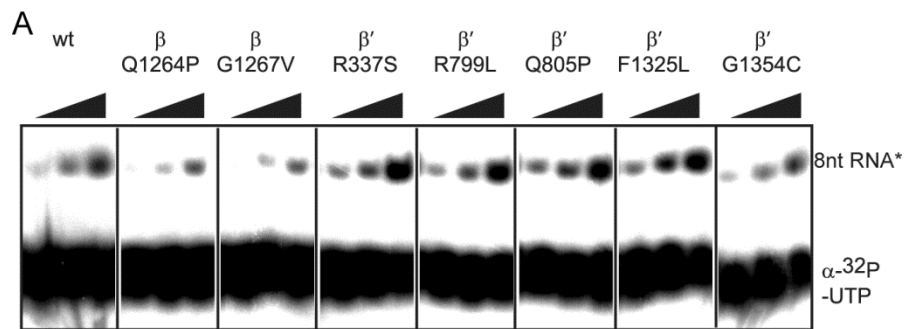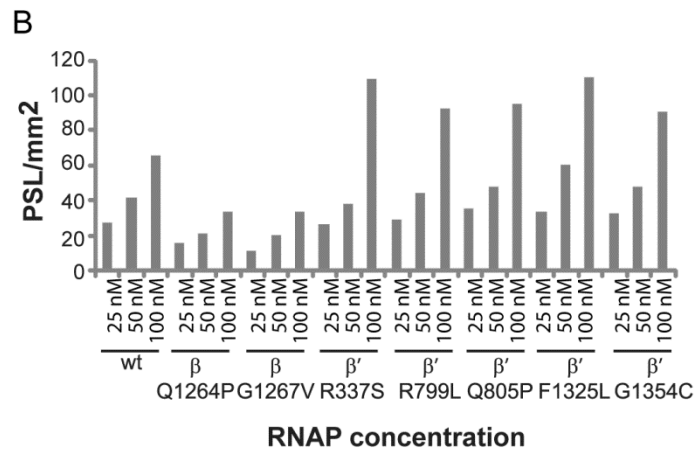

*Fig. S2*

**Fig. S2: Minimal scaffold assay – titrations.**

A: Minimal scaffold assay showing titrations of the RNAP variants. The accumulation of the 8nt RNA was evaluated is indicated. The 8 nt RNA signal was normalised with respect to the total signal.

B: Titration experiment showing linear responses in the accumulation of the 8nt RNA in proportion to the RNAP concentration.

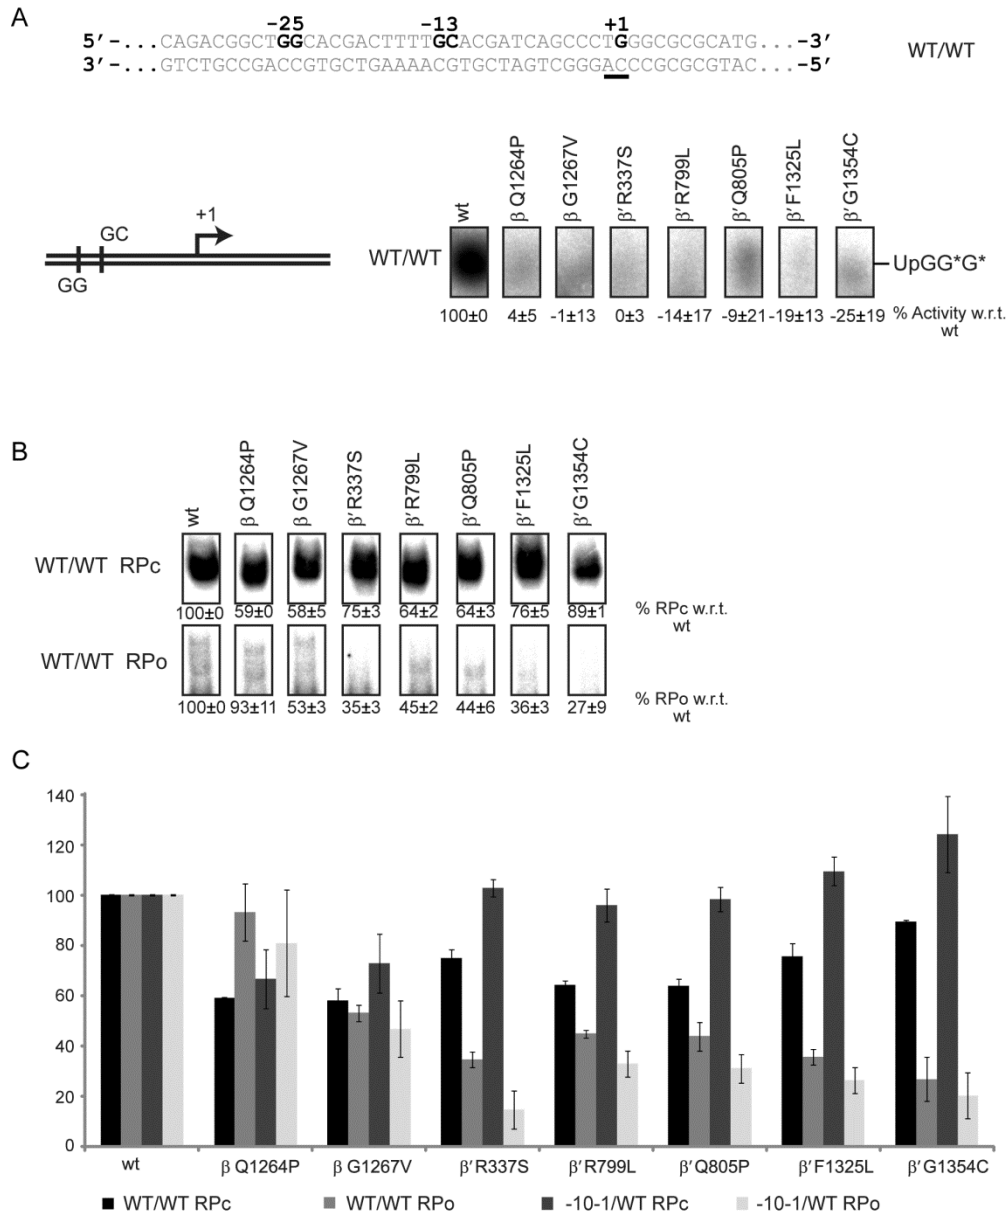

**Fig. S3**

**Fig. S3: Promoter-directed transcription using a homoduplex probe.**

The switch mutants are impaired in promoter-directed transcription when the WT/WT fully base paired template is used. The overall signals obtained from this template are substantially weaker than those obtained from the -10-1/WT template.

A: spRNA assay using the WT/WT template

B: RPc and RPo formation

C: RPc and RPo formation using the WT/WT template in comparison to the -10-1/WT template.

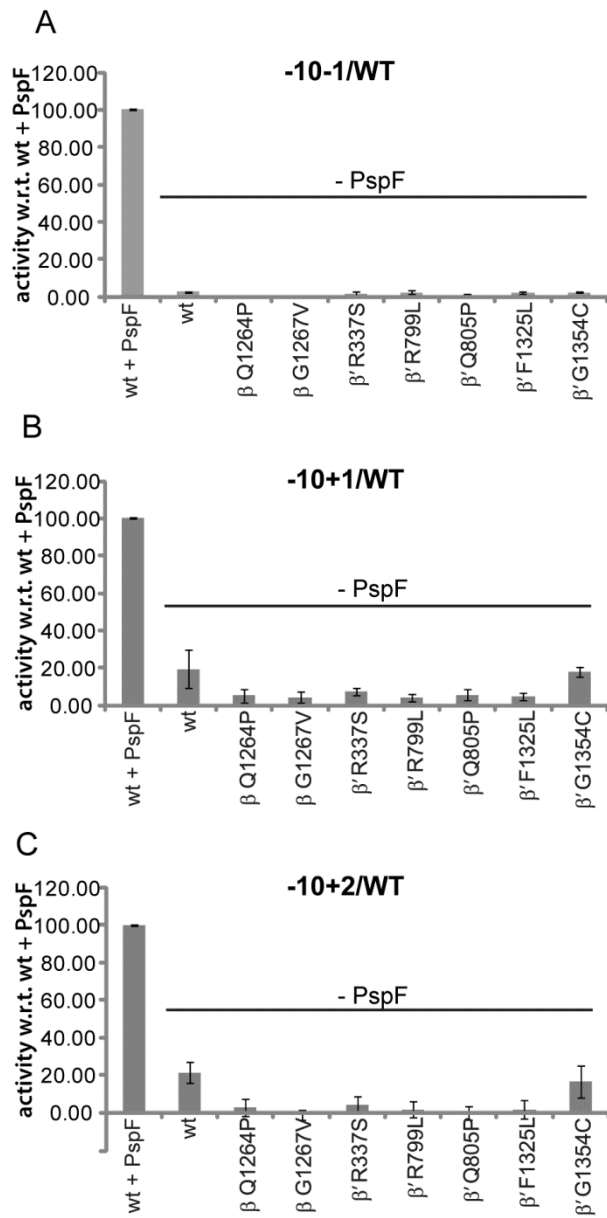

**Fig. S4**

**Fig. S4: Activator dependence.**

The activator and its ATPase are still required to support transcription from templates where the start site is premelted. A relatively low level of transcription activity is observed in the absence of the activator with all three templates.

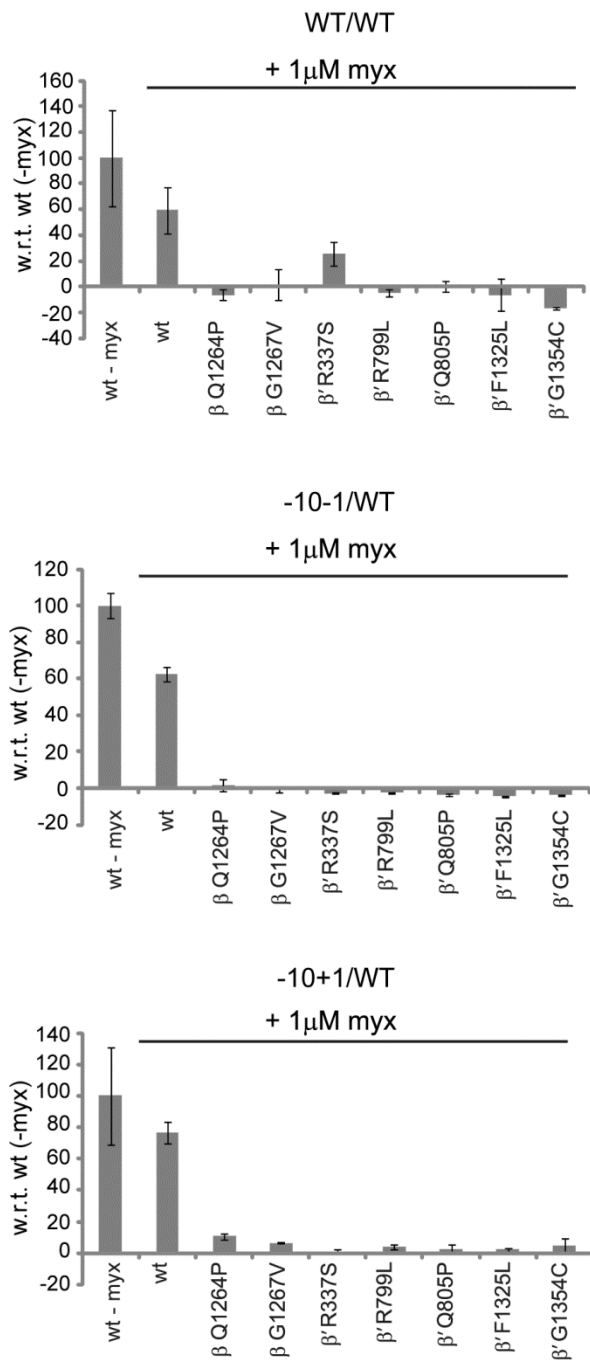

**Fig. S5**

**Fig. S5: Myxopyronin inhibition.**

1  $\mu$ M myxopyronin inhibits the switch domain variants on both the WT/WT and the -10-1/WT template and the start site melting requirement is not bypassed.

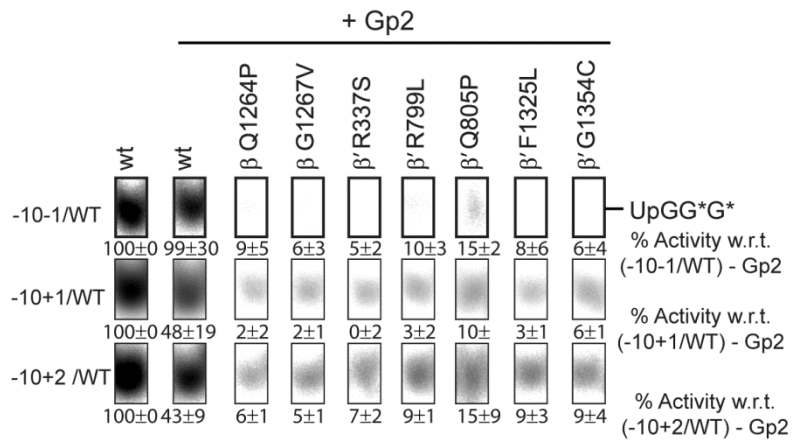

**Fig. S6**

**Fig.S 6: Gp2 inhibition.**

If start site melting is slow or lost, Gp2 inhibits  $E\sigma^{54}$  more efficiently.

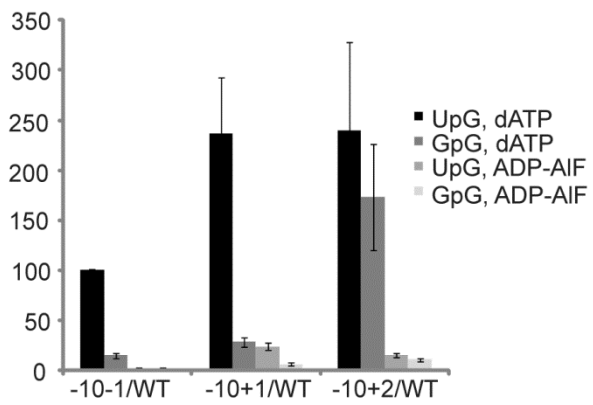

*Fig. S7*

**Fig. S7: Template comparison.**

Comparison of transcription initiation from the RPo or the RPi with UpG or GpG as priming dinucleotides, data are from three different templates.
